# Supplementary material for: Effect of thermal control of dry fomites on regulating the survival of human pathogenic bacteria responsible for nosocomial infections
Source: PubMed Central journal article supplement (PMC6934310; doi:10.1371/journal.pone.0226952), 2019-12-27
Supplement: pone.0226952.s001.pdf [file pone.0226952.s001.pdf]

**Supporting information: S1 Fig**

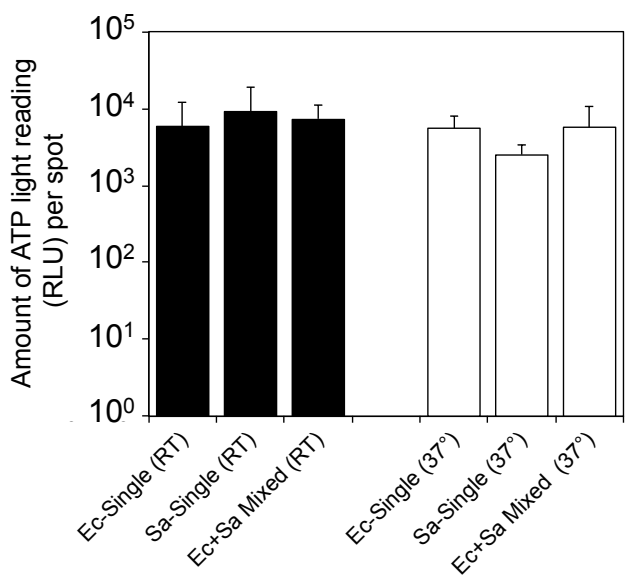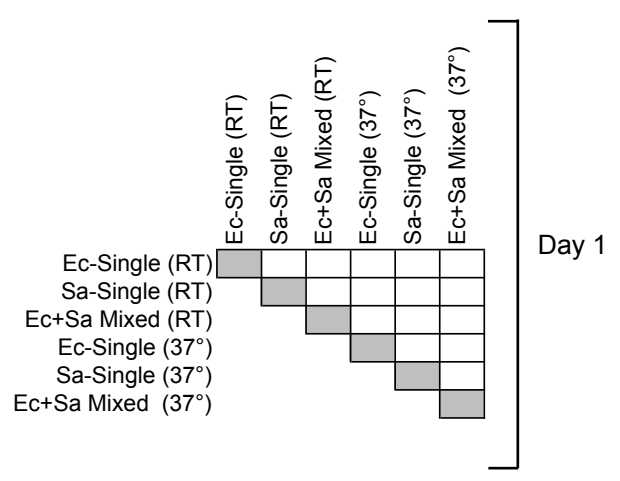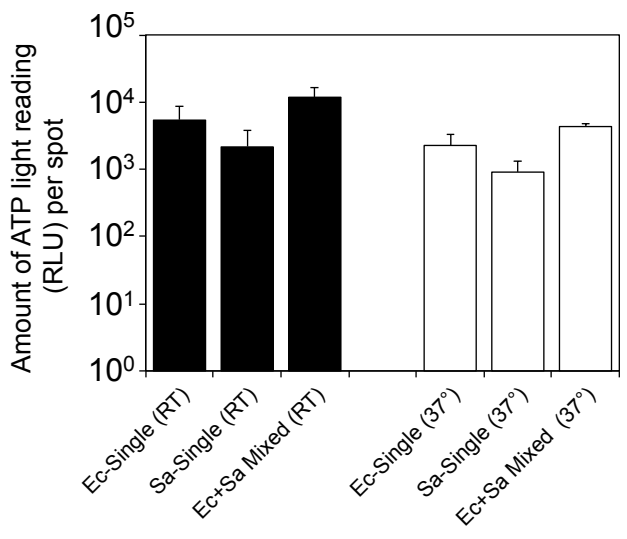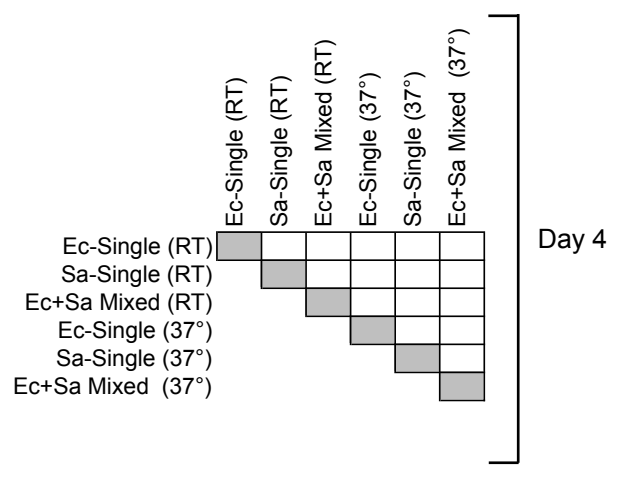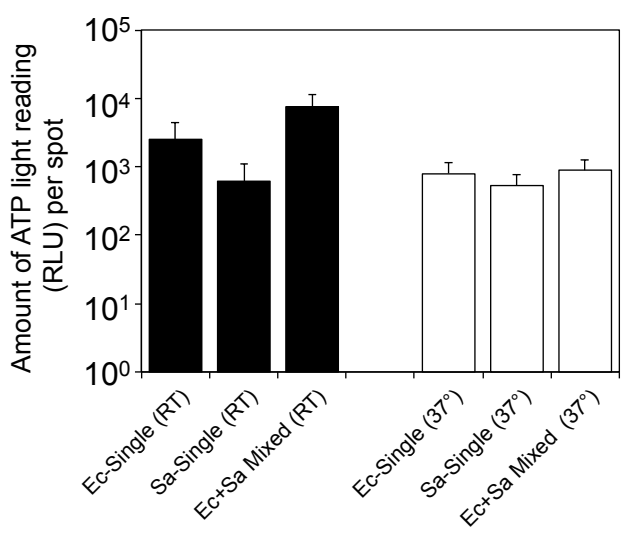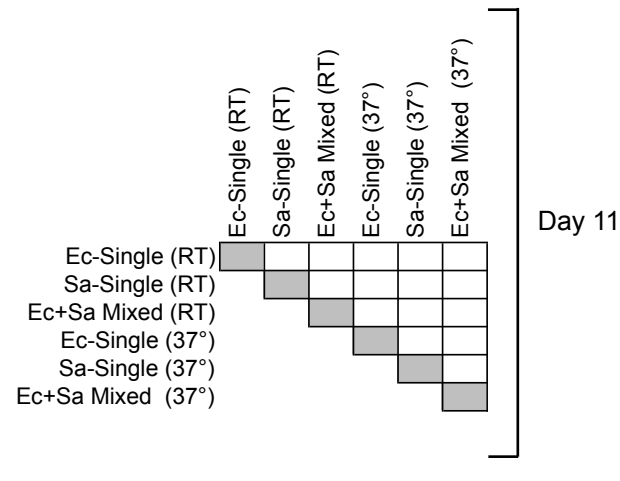

□ No statistical significant
